# Supplementary material for: First-principles screening of transition metal doped anatase TiO2(101) surfaces for the electrocatalytic nitrogen reduction
Source: Royal Society of Chemistry journal article supplement (doi:10.1039/d2cp04635k), 2023-01-01
Supplement: d2cp04635k1.pdf [file d2cp04635k1.pdf]

## Supplementary Information

### First-principles screening of transition metal doped anatase TiO<sub>2</sub>(101) surfaces for the electrocatalytic nitrogen reduction

Yongfei Ji\*, Paiyong Liu, Yungan Huang

*School of Chemistry and Chemical Engineering, Guangzhou University, Guangzhou 510006, Guangdong, P. R. China. E-mail: yongfeiji2018@gzhu.edu.cn*

**Table S1, The Relative Energy of the Surface With the Dopant Doped at Different Sites(eV)**

| Dopants | Site1      | Site2      | Site3      | Sit4       |
|---------|------------|------------|------------|------------|
| Ir      | 0          | 0.04642702 | 1.13668583 | 1.22735584 |
| Cr      | 0          | 0.13701374 | 0.44476791 | 0.88816938 |
| Sc      | 0          | 0.14180211 | 0.17622086 | 0.38880599 |
| Mn      | 0          | 0.17880504 | 0.45128399 | 1.21131919 |
| Fe      | 0          | 0.25752694 | 0.8250904  | 1.21900411 |
| Rh      | 0          | 0.40830493 | 0.78291125 | 0.99736544 |
| Pd      | 0          | 0.41392244 | 1.46027731 | 1.65723805 |
| Au      | 0          | 0.64854325 | 1.00723349 | 1.29694066 |
| Y       | 0          | 0.69018592 | 0.22867722 | 0.2516109  |
| Pt      | 0          | 0.76974785 | 1.26679189 | 2.28242388 |
| Ni      | 0          | 0.78979584 | 1.41399986 | 1.58480078 |
| Zn      | 0          | 0.80827829 | 1.46800348 | 1.47259435 |
| Cu      | 0          | 0.82690011 | 1.47392562 | 1.56611861 |
| Co      | 0          | 0.89508919 | 1.34151027 | 1.52187035 |
| Ag      | 0          | 0.92279324 | 1.78666584 | 1.44062722 |
| Cd      | 0          | 1.1118456  | 1.36661965 | 1.35674563 |
| Ru      | 0.03017855 | 0          | 0.62842579 | 0.7161452  |
| Os      | 0.23726463 | 0          | 0.66701252 | 0.80772544 |
| Re      | 0.79308001 | 0          | 0.19775126 | 0.29544987 |
| V       | 0.07374279 | 0.09159066 | 0          | 0.07676651 |
| Ta      | 1.7536626  | 0.44354855 | 0          | 0.01741497 |
| Ti      | 7.32586921 | 0.44354855 | 0          | 0.01741497 |
| Mo      | 0.60508138 | 0.5955415  | 0          | 0.01413072 |
| Nb      | 1.36100314 | 0.92720478 | 0          | 0.01730005 |
| W       | 1.53723415 | 1.22807506 | 0          | 0.05689599 |
| Zr      | 0.81581405 | 0.64639455 | 0.01593083 | 0          |
| Hf      | 0.93493218 | 0.59012864 | 0.0233688  | 0          |

**Table S2, Formation Energy of the First ( $E_f(O_v)-1$ ) and the Second ( $E_f(O_v)-2$ )  $O_v$  (eV)**

| dopant | $E_f(O_v)-1$ | $E_f(O_v)-2$ |
|--------|--------------|--------------|
| Ag     | -0.3359644   | 2.34642128   |
| Au     | 0.65611048   | 2.7700783    |
| Cd     | -1.4097848   | 3.85951566   |
| Co     | 1.28636153   | 3.59906865   |
| Cr     | 2.68699097   |              |
| Cu     | -0.4618405   | 3.58570648   |
| Fe     | 2.38299295   | 3.57209457   |
| Hf     | 3.62710024   |              |
| Ir     | 2.40863754   | 3.61604147   |
| Mn     | 2.29503594   |              |
| Mo     | 3.43439207   |              |
| Nb     | 3.53690554   |              |
| Ni     | 0.52780412   | 3.61408031   |
| Os     | 2.86180662   |              |
| Pd     | 0.73973172   | 3.57571971   |
| Pt     | 1.3530939    | 3.57181038   |
| Re     | 3.36616647   |              |
| Rh     | 1.91305502   | 3.61867798   |
| Ru     | 2.93328707   |              |
| Sc     | 1.33138805   |              |
| Ta     | 3.56056076   |              |
| Ti     | 3.6          |              |
| V      | 3.53346483   |              |
| W      | 3.18229778   |              |
| Y      | 1.35973659   |              |
| Zn     | -1.2839974   | 3.61478152   |
| Zr     | 3.63499882   |              |

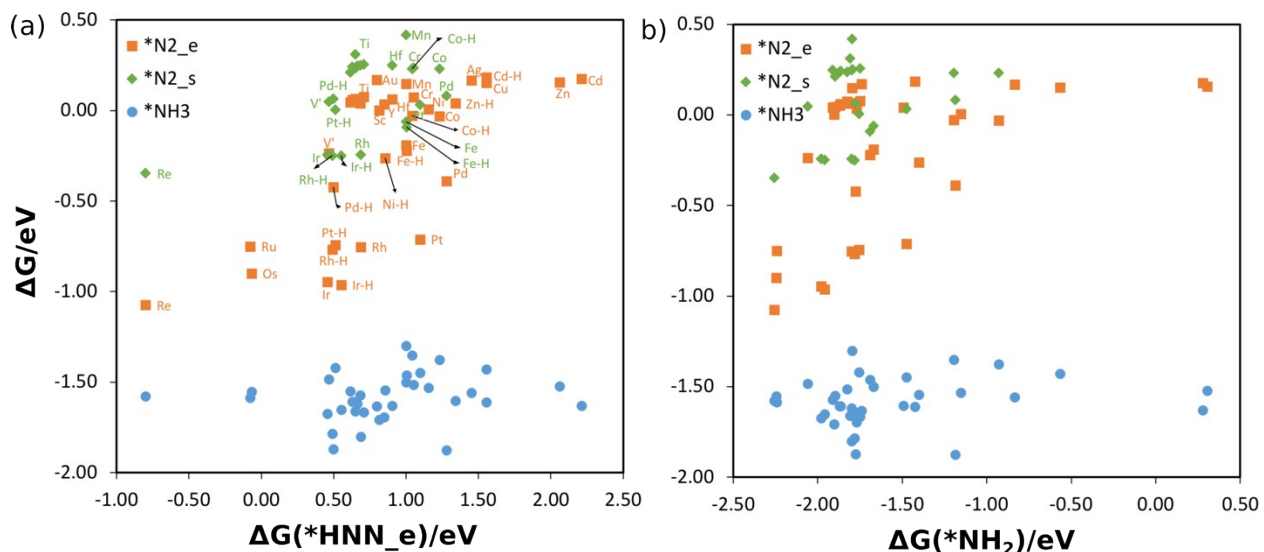

Figure S1, The scaling relation between the energy of  $*N_2_e$ ,  $*N_2_s$  and  $*NH_3$  against  $*HNN_e$  (a) and  $*NH_2$  (b). The data labeled as M-H presents the M-doped surface with an adsorbed H.

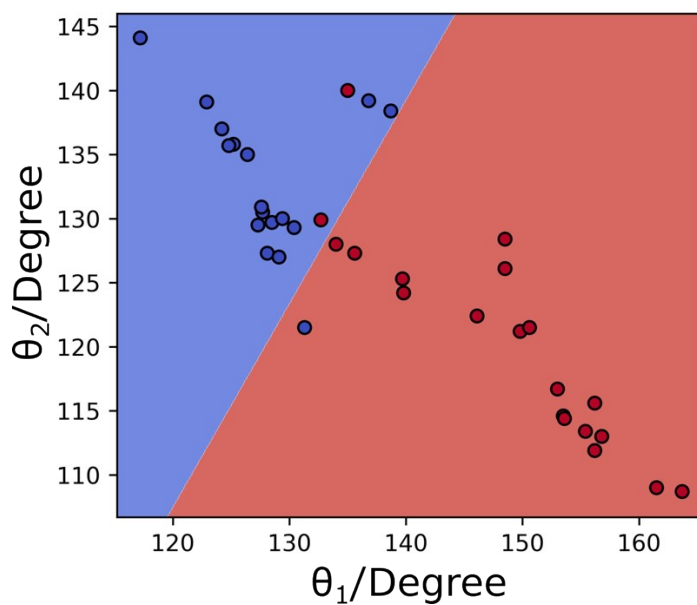

Figure S2, Classification of  $*HNN_e$  with  $\theta_1$  and  $\theta_2$  as features

**Table S3, Accuracy of the SVM Algorithm for Classifying the Structure of \*HNN**

|                        | Accuracy with different features   |                          |                                                 |                                                           | R <sup>2</sup> |       |
|------------------------|------------------------------------|--------------------------|-------------------------------------------------|-----------------------------------------------------------|----------------|-------|
|                        | (L <sub>1</sub> , L <sub>2</sub> ) | ( $\theta_1, \theta_2$ ) | (L <sub>1</sub> , L <sub>2</sub> , $\theta_1$ ) | (L <sub>1</sub> , L <sub>2</sub> , $\theta_1, \theta_2$ ) | Line 1         | Line2 |
| Re, Ru, Os to Group-I  | 84%                                | 92%                      | 100%                                            | 100%                                                      | 0.79           | 0.98  |
| Re, Ru, Os to Group-II | 54%                                | 86%                      | 84%                                             | 89%                                                       | 0.70           | 0.94  |

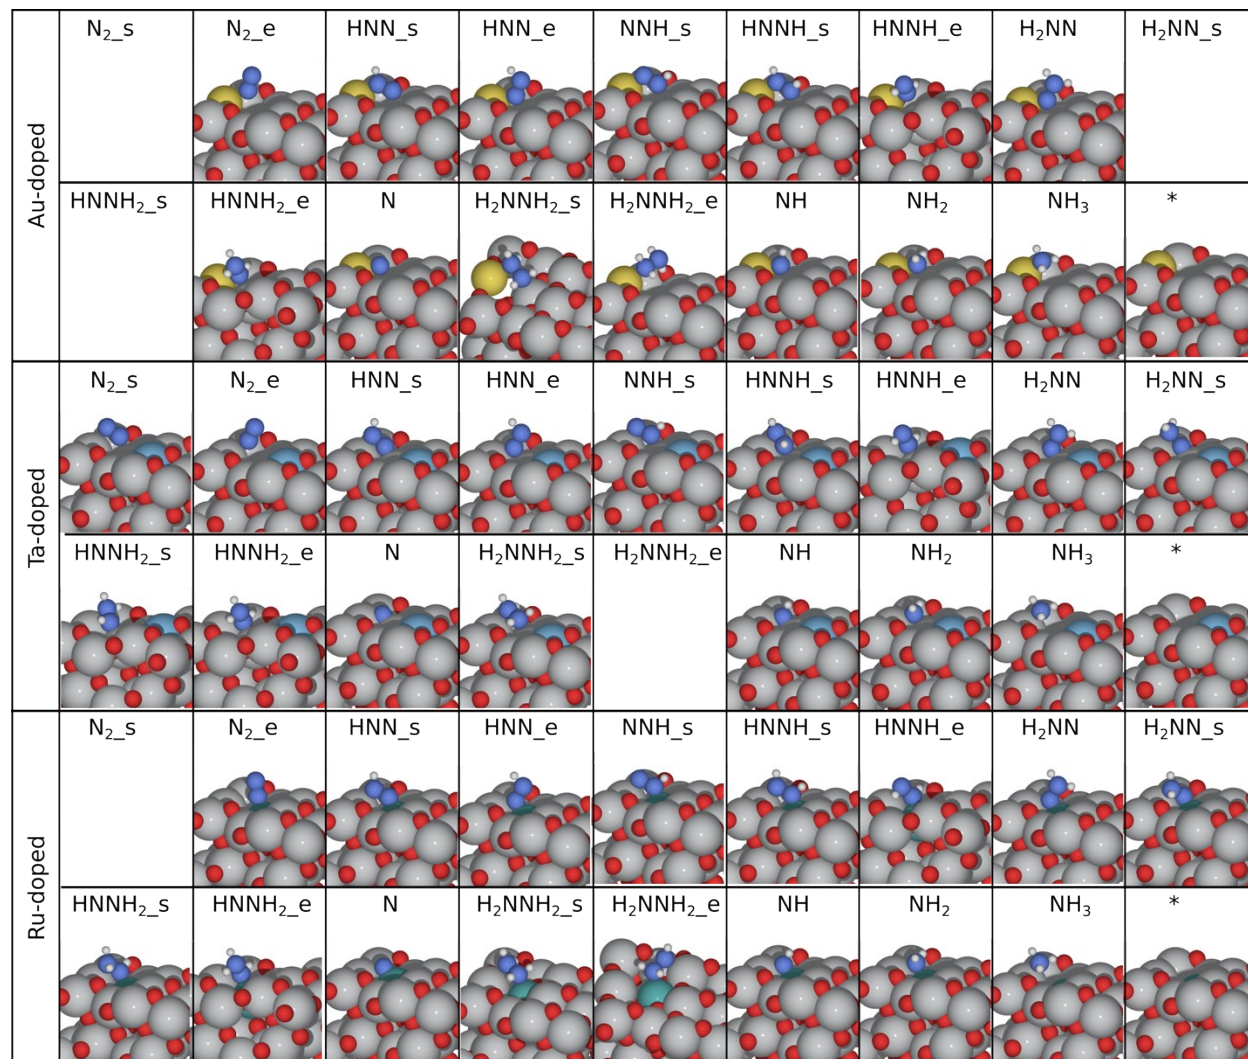

Figure S3, front view of all the optimized structures of the intermediates adsorbed on the Au, Ta, Ru-doped anatase TiO<sub>2</sub>(101) surface.

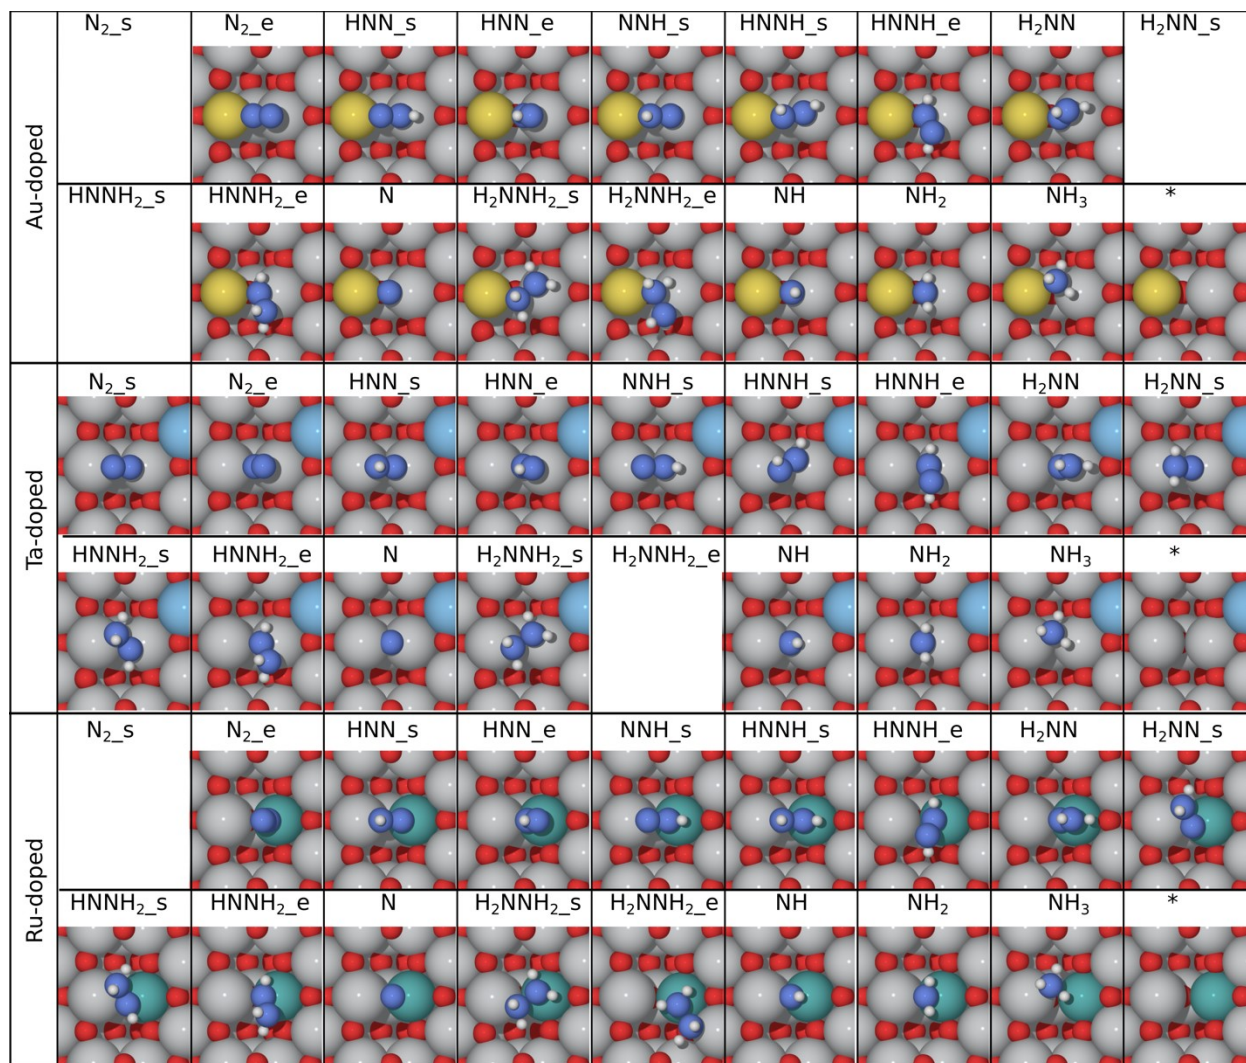

Figure S4, top view of all the optimized structures of the intermediates adsorbed on the Au, Ta, Ru-doped anatase TiO<sub>2</sub>(101) surface.

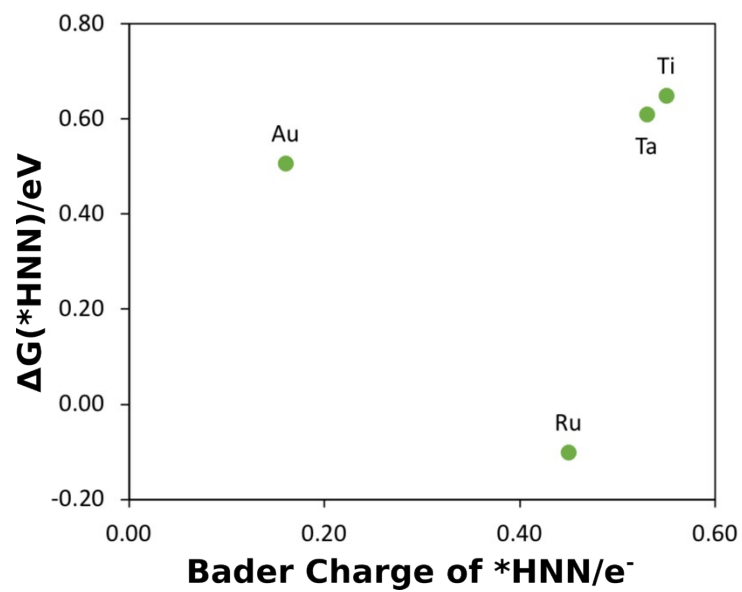

Figure S5, the energy of \*HNN against its Bader Charge on the Au, Ta, Ru doped and the undoped anatase TiO<sub>2</sub>(101) surface.
